# Supplementary material
Source: HighWire-hosted journal article supplement (https://jnm.snmjournals.org/highwire/filestream/108813/field_highwire_adjunct_files/0/262891_Supplemental_Data.pdf)
Supplement: 262891_Supplemental_Data.pdf [file 262891_Supplemental_Data.pdf]

**Supplemental Table 1:** PET-CT acquisition parameters of the 3 Hospital Centers

|                                               | <b>Rennes Hospital Center</b>                                                                                                           | <b>Nantes Hospital Center</b>                                                                 | <b>Brest Hospital Center</b>                                                                          |
|-----------------------------------------------|-----------------------------------------------------------------------------------------------------------------------------------------|-----------------------------------------------------------------------------------------------|-------------------------------------------------------------------------------------------------------|
| Injection                                     | 4 MBq/kg of FDG <sup>d</sup><br>(0.0001Ci/kg)                                                                                           | 3 MBq/kg of FDG <sup>d</sup><br>(0.00008Ci/kg)                                                | 3 MBq/kg of FDG <sup>d</sup><br>(0.00008Ci/kg)                                                        |
| Fasting period before injection (mean, hours) | 4                                                                                                                                       | 5                                                                                             | 6                                                                                                     |
| Uptake time (mean, minutes)                   | 60                                                                                                                                      | 60                                                                                            | 60                                                                                                    |
| Imaging system                                | Discovery PET/CT <sup>c</sup> imaging-system or Siemens Biograph 6 True Point PET/CT scanner (Siemens Healthineers©, Erlangen, Germany) | Biograph-mCT <sup>TM</sup> 40 or 64 imaging system (Siemens Healthineers©, Erlangen, Germany) | Biograph-mCT <sup>TM</sup> 40 or 64 imaging system                                                    |
| Reconstruction                                | OSEM <sup>a</sup> (2 iterations, 28 subsets)<br>Iterative fully 3D (Discovery ST)                                                       | OSEM <sup>a</sup> with PSF <sup>b</sup> correction and TOF <sup>c</sup> information           | OSEM <sup>a</sup> with PSF <sup>b</sup> modeling and TOF <sup>c</sup> acquisition capabilities method |

<sup>a</sup>OSEM: Ordered Subset Expectation Maximization , <sup>b</sup>PSF: Point spread function, <sup>c</sup>TOF: Time-of-Flight, <sup>d</sup>FDG : Fluorodeoxyglucose (IBA Molecular Imaging, Saclay, France)., <sup>e</sup>PET/CT: Positron Emission Tomography/Computed Tomography

**Supplemental Table 2:** Patient, tumor, treatment and follow-up characteristics for the training and validation cohorts

| Characteristics                          | Training cohort<br>(N = 318 patients) | Validation cohort<br>(N = 64 patients) | p-value* |
|------------------------------------------|---------------------------------------|----------------------------------------|----------|
| <b>Patients</b>                          |                                       |                                        |          |
| Age, mean (SD)                           | 61.51 (9.33)                          | 58.86 (10.82)                          | 0.071    |
| Gender, n (%)                            |                                       |                                        | 0.272    |
| Male                                     | 260 (82.07)                           | 56 (87.50)                             |          |
| Female                                   | 58 (17.93)                            | 8 (12.50)                              |          |
| Smoking status (yes, n (%))              | 269 (84.59)                           | 55 (85.94)                             | 0.744    |
| Amount of tobacco (pack-year, SD)        | 23.34 (24.73)                         | 18.84 (21.42)                          | 0.176    |
| Alcohol consumption (yes, n(%))          | 166 (52.20)                           | 29 (45.31)                             | 0.326    |
| Amount of alcohol consumed (g, SD)       | 21.59 (41.18)                         | 14.41 (28.38)                          | 0.092    |
| Performance Status, n (%)                |                                       |                                        | 0.564    |
| 0-1                                      | 309 (97.17)                           | 63 (98.44)                             |          |
| 2                                        | 9 (2.83)                              | 1 (1.56)                               |          |
| <b>Tumor</b>                             |                                       |                                        |          |
| Tumor site, n (%)                        |                                       |                                        | 0.777    |
| Oral cavity                              | 106 (33.33)                           | 20 (31.25)                             |          |
| Oropharynx                               | 77 (24.21)                            | 18 (28.13)                             |          |
| Larynx                                   | 74(23.27)                             | 12 (18.75)                             |          |
| Hypopharynx                              | 61 (19.18)                            | 14 (21.88)                             |          |
| cT classification, n(%)                  |                                       |                                        | 0.016    |
| T1                                       | 80 (25.16)                            | 8 (12.50)                              |          |
| T2                                       | 85 (27.04)                            | 14 (21.88)                             |          |
| T3                                       | 43 (13.52)                            | 17 (26.56)                             |          |
| T4                                       | 110 (34.28)                           | 25 (39.06)                             |          |
| cN classification, n(%)                  |                                       |                                        | 0.065    |
| N0                                       | 144 (45.28)                           | 17 (26.56)                             |          |
| N1                                       | 49 (15.41)                            | 9 (14.06)                              |          |
| N2                                       | 118 (31.11)                           | 35 (54.69)                             |          |
| N3                                       | 7 (2.20)                              | 3 (4.69)                               |          |
| Staging AJCC, n (%)                      |                                       |                                        | 0.034    |
| I                                        | 44 (13.84)                            | 2 (3.13)                               |          |
| II                                       | 38 (12.26)                            | 4 (6.25)                               |          |
| III                                      | 51 (16.04)                            | 12 (18.75)                             |          |
| IV                                       | 185 (57.86)                           | 46 (71.88)                             |          |
| pT classification, n (%)                 |                                       |                                        | 0.016    |
| pT1                                      | 72 (22.64)                            | 7 (10.64)                              |          |
| pT2                                      | 94 (29.56)                            | 13 (20.31)                             |          |
| pT3                                      | 47 (14.78)                            | 17 (26.56)                             |          |
| pT4                                      | 105 (33.02)                           | 27 (42.19)                             |          |
| pN classification, n (%)                 |                                       |                                        | 0.028    |
| pN0                                      | 151 (47.48)                           | 19 (29.69)                             |          |
| pN1                                      | 42 (13.21)                            | 10 (15.63)                             |          |
| pN2a                                     | 15 (4.71)                             | 3 (4.69)                               |          |
| pN2b                                     | 68 (21.38)                            | 21 (32.81)                             |          |
| pN2c                                     | 33 (10.38)                            | 7 (10.94)                              |          |
| pN3                                      | 9 (2.83)                              | 4 (6.25)                               |          |
| Lymph node involvement, mean number (SD) | 1.70 (3.47)                           | 2.05 (6.44)                            | 0.217    |
| Extracapsular extension, n (%)           | 94 (29.56)                            | 26 (40.63)                             | 0.082    |
| Negative surgical margin, n(%)           | 252 (79.25)                           | 34 (53.13)                             | 0.001    |
| Perineural invasion, n (%)               | 94 (29.56)                            | 26 (40.63)                             | 0.082    |
| Vascular invasion, n (%)                 | 48 (15.09)                            | 27 (42.19)                             | 0.001    |
| p16 status, n(%)                         |                                       |                                        | 0.004    |
| Yes                                      | 16 (5.03%)                            | 10 (15.63)                             |          |
| No                                       | 21 (6.60%)                            | 7 (10.94)                              |          |
| Not applicable/available                 | 281(88.37%)                           | 47 (73.44)                             |          |
| Tumor volume in mL (SD)                  |                                       |                                        | 0.130    |
| Primitive tumor                          | 28.90 (29.18)                         | 34.93 (28.33)                          |          |
| Total (tumor and nodes)                  | 45.18 (49.07)                         | 53.72 (42.32)                          | 0.195    |
| <b>Treatment</b>                         |                                       |                                        |          |
| Type of surgery                          |                                       |                                        | 0.267    |
| Oropharyngectomy                         | 80 (25.16)                            | 18 (28.13)                             |          |
| Glossectomy                              | 30 (9.43)                             | 5 (7.81)                               |          |
| Mandibulectomy I or NI or maxillectomy   | 73 (22.96)                            | 15 (23.43)                             |          |
| Partial laryngectomy                     | 44 (13.84)                            | 3 (4.69)                               |          |
| Total laryngectomy/ pharyngolaryngectomy | 91 (28.61)                            | 23 (35.94)                             |          |

|                                 |             |            |       |
|---------------------------------|-------------|------------|-------|
| Radiotherapy postsurgery, n (%) | 210 (66.04) | 54 (84.38) | 0.004 |
| Concomitant chemotherapy, n(%)  | 120 (37.74) | 38 (59.38) | 0.006 |
| <b>Follow-up</b>                |             |            |       |
| Distant Metastasis, n(%)        | 51 (16.04)  | 10 (15.63) | 0.934 |
| Deaths, n(%)                    | 116 (36.48) | 19 (29.69) | 0.299 |

SD = standard deviation, 95% CI = 95% confidence interval, AJCC = American Joint Committee on Cancer, NI = Noninterruptive, I = Interruptive

\*= Mann-Whitney test for continuous variables, chi<sup>2</sup> for dichotomous variables, or Fisher exact test when the frequency was small and log-rank test for survival analysis.

**Supplemental Table 3:** Results of the Cox model bootstrap validation (1000 resampling) for overall survival

| Parameters        | HR[95% CI]         | P value of the parameter | c-index |
|-------------------|--------------------|--------------------------|---------|
| Stage T           |                    | <0.001                   | 0.63    |
| T1-T2             | Ref.               |                          |         |
| T3-T4             | 2.01 [1.13 ; 4.65] |                          |         |
| MTV N (SUV = 3.0) | 1.01 [1 ; 1.18]    | 0.03                     |         |

HR = Hazard ratio, 95% CI = 95% confidence interval

**Supplemental Table 4:** Results of the Cox model bootstrap validation (1000 resampling) for distant metastasis

| Parameters        | HR[95% CI]       | P value of the parameter | c-index |
|-------------------|------------------|--------------------------|---------|
| Stage T           |                  | <0.001                   | 0.74    |
| T1-T2             | Ref.             |                          |         |
| T3-T4             | 3.59 [1.9-7.6]   |                          |         |
| MTV N (SUV = 3.0) | 1.01 [1.0;1.02]  | 0.055                    |         |
| Distance max TN   | 1.12 [1.03;1.21] | 0.007                    |         |

HR = Hazard ratio, 95% CI = 95% confidence interval, NS=Not significant, Distance max TN = Maximal tumor-node distance

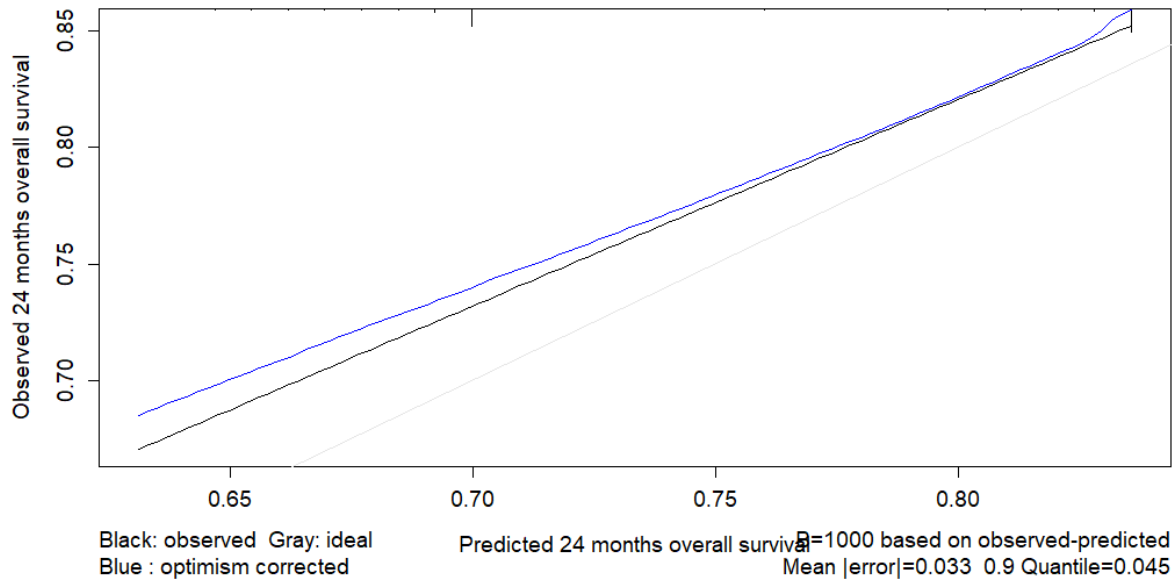

**Supplemental Figure 1:** Internal calibration of the final OS model for the training cohort at 24 months. The gray line is the ideal model, the black line is the observed survival, and the blue-dotted line is the predicted survival corrected to avoid overfitting.

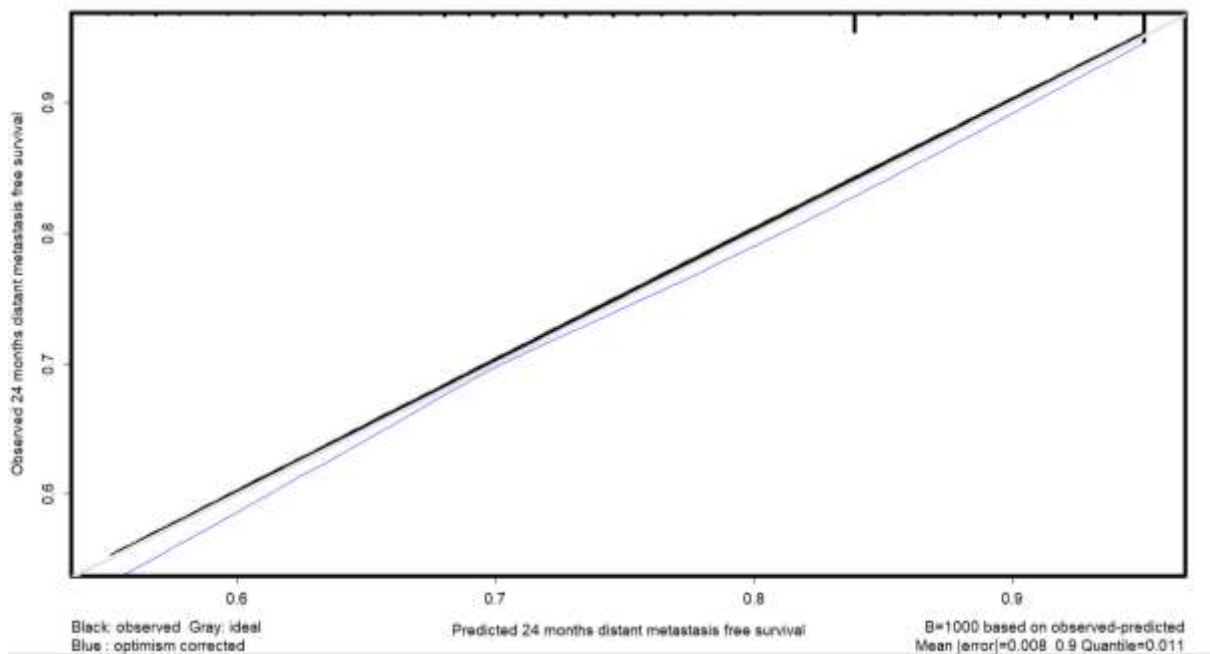

**Supplemental Figure 2:** Internal calibration of the final DMFS model for the training cohort at 24 months. The gray line is the ideal model, the black line is the observed survival and the blue-dotted line is the predicted survival corrected to avoid overfitting.
